# Supplementary material
Source: publisher figshare collection journal article supplement (https://karger.figshare.com/ndownloader/files/21695685)
Supplement: Supplementary file 1 [file 21695685]

**Supplementary appendix to**

# **Effect of breathing oxygen-enriched air on exercise performance in patients with chronic obstructive pulmonary disease. Randomized, placebo-controlled, cross-over trial.**

Elisabeth D. Hasler*, Stéphanie Saxer*, Simon R. Schneider, Michael Furian, Mona Lichtblau, Esther I. Schwarz, Konrad E. Bloch, Silvia Ulrich

*these two authors contributed equally

**Correspondence**

Prof. Dr. med. Silvia Ulrich

Department of Pulmonology

University Hospital Zurich

Rämistrasse 100

CH-8091 Zürich, Switzerland

Voice: +41 44 255 22 20, fax: +41 44 255 44 51

E-mail: [silvia.ulrich@usz.ch](mailto:silvia.ulrich@usz.ch)

| Table S1. Linear regression analysis of change in maximal workload induced by oxygen-enriched air during incremental (ramp) exercise test | | | | | | | | |
| --- | --- | --- | --- | --- | --- | --- | --- | --- |
| **Dependent variable = change in maximal workload, watt** | **Univariable analysis** | | | **Multivariable model** | | | | |
| **coefficient** | **95% CI** | **p-value** | | **coefficient** | **95% CI** | **p-value** | |
| Sex (female = 0, male = 1) | -8.79 | -10.1 to 8.4 | 0.844 | |  |  |  | |
| Age, years | -0.31 | -1.1 to 0.5 | 0.411 | |  |  |  | |
| Wmax (air), watt | 0.29 | 0.1 to 0.5 | 0.003 | | 0.11 | 0.01 to 0.21 | 0.038 | |
| 6MWT, m | 0.03 | -0.02 to 0.1 | 0.251 | |  |  |  | |
| Pack years smoked, n | 0.51 | -0.1 to 0.2 | 0.517 | |  |  |  | |
| FEV1, % predicted | 0.27 | 0.1 to 0.5 | 0.018 | |  |  |  | |
| DLCO, % predicted | 0.13 | -0.2 to 0.5 | 0.452 | |  |  |  | |
| Body mass index, kg/m2 | -0.36 | -1.5 to 0.8 | 0.521 | |  |  |  | |
| Test order | 10.7 | 3.2 to 18.2 | 0.008 | |  |  |  | |
| SpO2 at rest (air), % | 0.46 | -1.7 to 2.6 | 0.662 | |  |  |  | |
| SpO2 at end of 6MWT, % | 0.62 | -0.3 to 1.5 | 0.150 | |  |  |  | |
| PaO2, kPa | 2.46 | -1.8 to 6.7 | 0.239 | |  |  |  | |
| PaCO2, kPa | -2.65 | -10.8 to 5.5 | 0.500 | |  |  |  | |
| n = 20 patients with chronic obstructive pulmonary disease. Independent variables with p <0.05 in the univariable analysis were included into the multivariable stepwise model. Only maximal workload with ambient air remainded significant in the multivariable model (R2 0.631, p=0.003) as predictor for change in maximal workload with oxygen-enriched air.  CI = confidence interval, DLCO = single breath carbon dioxide diffusion capacity, FEV1 = forced expiratory volume in 1 second, 6MWT = 6-minute walk test, SpO2 = oxygen saturation. Test order was defined as first test with air = 0 and oxygen = 1. Pack years smoked corresponds to smoking one pack of 20 cigarettes a day for one year. | | | | | | | |

| **Table S2. Linear regression analysis of change in exercise duration induced by oxygen-enriched air during constant work-rate exercise test** | | | | | |
| --- | --- | --- | --- | --- | --- |
| **Dependent variable = change in exercise duration, sec** | **Univariable analysis** | | |
| **coefficient** | **95% CI** | **p-value** |
| Sex (female = 0, male = 1) | 135 | -183 to 452 | 0.385 |
| Age, years | 4.7 | -32.4 to 22.9 | 0.724 |
| Exercise duration (air), sec | 0.066 | -0.54 to 0.67 | 0.82 |
| 6MWT, m | -0.32 | -2.2 to 1.6 | 0.729 |
| Pack years smoked, n | -1.36 | -7.07 to 4.33 | 0.620 |
| FEV1, % predicted | 3.33 | -5.47 to 12.13 | 0.437 |
| DLCO, % predicted | -1.76 | -12.03 to 15.5 | 0.79 |
| Body mass index, kg/m2 | -19.6 | -59.3 to 20.2 | 0.315 |
| Test order | 248.8 | -49.6 to 547.1 | 0.097 |
| SpO2 at rest (air), % | 19.2 | -54.4 to 92.8 | 0.59 |
| SpO2 at end of 6MWT, % | 11.0 | -20.7 to 42.7 | 0.477 |
| PaO2, kPa | -38.8 | -190.7 to 113.1 | 0.596 |
| PaCO2, kPa | 9.39 | -275.4 to 294.1 | 0.945 |
| n = 20 patients with chronic obstructive pulmonary disease. CI = confidence interval, DLCO = single breath carbon dioxide diffusion capacity, FEV1 = forced expiratory volume in 1 second, 6MWT = 6-minute walk test, SpO2 = peripheral oxygen saturation. Test order was defined as first test with air = 0 and oxygen = 1. Pack years smoked corresponds to smoking one pack of 20 cigarettes a day for one year. | | | | |
